# Supplementary material for: Genomic and Epidemiologic Surveillance of SARS-CoV-2 in the Pandemic Period: Sequencing Network of the Lazio Region, Italy
Source: MDPI journal article supplement (doi:10.3390/v15112192), 2023-10-31
Supplement: s1 [file s1]

## SUPPLEMENTAL TABLE

### **Data Availability**

GISAID Identifier: EPI\_SET\_230830rs

doi: 10.55876/gis8.230830rs

All genome sequences and associated metadata in this dataset are published in GISAID's EpiCoV database. To view the contributors of each individual sequence with details such as accession number, Virus name, Collection date, Originating Lab and Submitting Lab and the list of Authors, visit [10.55876/gis8.230830rs](https://gisaid.org/gis8.230830rs)

### **Data Snapshot**

- EPI\_SET\_230830rs is composed of 11,516 individual genome sequences.
- The collection dates range from 2020-01-29 to 2022-10-31;
- Data were collected in 1 countries and territories;
- All sequences in this dataset are compared relative to hCoV-19/Wuhan/WIV04/2019 (WIV04), the official reference sequence employed by GISAID (EPI\_ISL\_402124). Learn more at <https://gisaid.org/WIV04>.
