# Supplementary material for: Genomic and Epidemiologic Surveillance of SARS-CoV-2 in the Pandemic Period: Sequencing Network of the Lazio Region, Italy
Source: Viruses. 2023 Oct 31;15(11):2192. doi: 10.3390/v15112192 (PMC10674723; doi:10.3390/v15112192)
Supplement: Supplementary file 1 [file viruses-15-02192-s001.zip]

Archive with 4 entries (4 files):
- Figure S1.jpg
- Figure S2.jpg
- File S1.pdf
- File S2.pdf
